# Supplementary material for: Calprotectin (S100A8/A9) has the strongest association with ultrasound-detected synovitis and predicts response to biologic treatment: results from a longitudinal study of patients with established rheumatoid arthritis
Source: Springer Nature journal article supplement (doi:10.1186/s13075-016-1201-0), 2017-01-12
Supplement: MOESM1 [file 11995364]

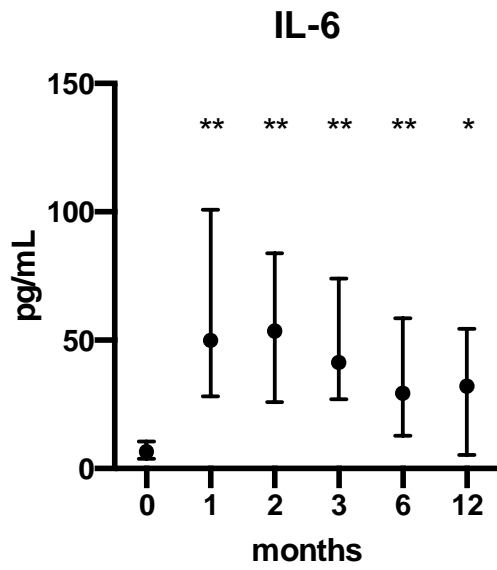

**Supplementary figure S1.** Median (error bars = interquartile range) levels of interleukin 6 in 12 patients (8.5%) starting with tocilizumab at baseline. \* $p < 0.05$ , \*\* $p < 0.01$  rise from baseline
