# Supplementary material for: Calprotectin (S100A8/A9) has the strongest association with ultrasound-detected synovitis and predicts response to biologic treatment: results from a longitudinal study of patients with established rheumatoid arthritis
Source: Springer Nature journal article supplement (doi:10.1186/s13075-016-1201-0), 2017-01-12
Supplement: MOESM2 [file 11995364]

**Supplementary table S1.** Spearman's rank correlation coefficients ( $r_s$ ) between biomarkers and sum US scores and clinical parameters during follow-up

|                     | Sum GS score | Sum PD score | Assessor's global VAS | DAS28  | Swollen joints (of 32) | Tender joints (of 32) | Patient's global VAS | Joint pain VAS |
|---------------------|--------------|--------------|-----------------------|--------|------------------------|-----------------------|----------------------|----------------|
| One month           |              |              |                       |        |                        |                       |                      |                |
| <b>Calprotectin</b> | 0.51**       | 0.53**       | 0.51**                | 0.44** | 0.42**                 | 0.21*                 | 0.23*                | 0.32**         |
| <b>S100A12</b>      | 0.30**       | 0.38**       | 0.35**                | 0.29** | 0.28**                 | 0.13                  | 0.08                 | 0.11           |
| <b>IL-6</b>         | 0.39**       | 0.42**       | 0.43**                | 0.38** | 0.36**                 | 0.20*                 | 0.15                 | 0.24*          |
| <b>VEGF</b>         | 0.18*        | 0.17*        | -0.03                 | 0.08   | -0.01                  | 0.05                  | 0.08                 | 0.17*          |
| <b>ESR</b>          | 0.04         | 0.14         | 0.28**                | 0.56** | 0.10                   | 0.08                  | 0.09                 | 0.12           |
| <b>CRP</b>          | 0.21*        | 0.23*        | 0.29**                | 0.30** | 0.17*                  | -0.02                 | 0.05                 | 0.08           |
| Two months          |              |              |                       |        |                        |                       |                      |                |
| <b>Calprotectin</b> | 0.50**       | 0.53**       | 0.50**                | 0.45** | 0.46**                 | 0.24*                 | 0.20*                | 0.25*          |
| <b>S100A12</b>      | 0.26*        | 0.36**       | 0.39**                | 0.32** | 0.30**                 | 0.16*                 | 0.19*                | 0.20*          |
| <b>IL-6</b>         | 0.51**       | 0.49**       | 0.55**                | 0.43** | 0.50**                 | 0.25*                 | 0.16                 | 0.20*          |
| <b>VEGF</b>         | 0.21*        | 0.19*        | 0.17*                 | 0.11   | 0.10                   | 0.03                  | 0.09                 | 0.17*          |
| <b>ESR</b>          | 0.06         | 0.15         | 0.22*                 | 0.57** | 0.09                   | 0.13                  | 0.22*                | 0.25*          |
| <b>CRP</b>          | 0.30**       | 0.33**       | 0.34**                | 0.30** | 0.28**                 | 0.03                  | 0.13                 | 0.13           |
| Three months        |              |              |                       |        |                        |                       |                      |                |
| <b>Calprotectin</b> | 0.37**       | 0.46**       | 0.48**                | 0.44** | 0.41**                 | 0.21*                 | 0.29**               | 0.27**         |
| <b>S100A12</b>      | 0.32**       | 0.36**       | 0.36**                | 0.30** | 0.31**                 | 0.18*                 | 0.14                 | 0.12           |
| <b>IL-6</b>         | 0.43**       | 0.47**       | 0.53**                | 0.35** | 0.53**                 | 0.18*                 | 0.24*                | 0.29**         |
| <b>VEGF</b>         | 0.19*        | 0.16         | 0.17*                 | 0.03   | 0.13                   | -0.07                 | 0.16                 | 0.16           |
| <b>ESR</b>          | 0.01         | 0.12         | 0.21*                 | 0.57** | 0.05                   | 0.07                  | 0.22*                | 0.18*          |
| <b>CRP</b>          | 0.18*        | 0.26*        | 0.33**                | 0.44** | 0.26**                 | 0.05                  | 0.20*                | 0.20*          |
| Six months          |              |              |                       |        |                        |                       |                      |                |
| <b>Calprotectin</b> | 0.48**       | 0.47**       | 0.44**                | 0.37** | 0.45**                 | 0.12                  | 0.23*                | 0.20*          |

|                |        |        |        |        |        |      |       |       |
|----------------|--------|--------|--------|--------|--------|------|-------|-------|
| <b>S100A12</b> | 0.26*  | 0.24*  | 0.33** | 0.27** | 0.23*  | 0.09 | 0.14  | 0.18* |
| <b>IL-6</b>    | 0.40** | 0.49** | 0.36** | 0.36** | 0.40** | 0.15 | 0.17* | 0.22* |
| <b>VEGF</b>    | 0.18*  | 0.12   | 0.17*  | 0.04   | 0.10   | 0.01 | 0.14  | 0.16  |
| <b>ESR</b>     | 0.19*  | 0.21*  | 0.22*  | 0.53** | 0.09   | 0.09 | 0.09  | 0.09  |
| <b>CRP</b>     | 0.33** | 0.35** | 0.35** | 0.41** | 0.28** | 0.07 | 0.22* | 0.17* |

---

Twelve months

|                     |        |        |        |        |        |       |       |       |
|---------------------|--------|--------|--------|--------|--------|-------|-------|-------|
| <b>Calprotectin</b> | 0.25*  | 0.31** | 0.20*  | 0.25*  | 0.24*  | 0.12  | 0.22* | 0.23* |
| <b>S100A12</b>      | 0.07   | 0.17*  | 0.03   | 0.09   | -0.00  | -0.04 | 0.04  | 0.04  |
| <b>IL-6</b>         | 0.43** | 0.43** | 0.33** | 0.24*  | 0.37** | 0.13  | 0.11  | 0.20* |
| <b>VEGF</b>         | 0.07   | 0.01   | 0.02   | -0.08  | -0.03  | -0.08 | 0.09  | 0.07  |
| <b>ESR</b>          | 0.01   | 0.15   | 0.25*  | 0.60** | 0.11   | 0.14  | 0.17* | 0.09  |
| <b>CRP</b>          | 0.20*  | 0.30** | 0.27** | 0.34** | 0.26*  | 0.14  | 0.13  | 0.12  |

---

Sum GS score = sum of grey scale scores on a 0-3 scale of 36 joints and four tendon sheaths, sum PD score= sum power Doppler scores on a 0-3 scale of 36 joints and four tendon sheaths, VAS = visual analogue scale, DAS28 = disease activity score of 28 joints (including ESR), VEGF = vascular endothelial growth factor, IL-6 = interleukin 6, ESR = erythrocyte sedimentation rate, CRP = C-reactive protein, \*p<0.05, \*\*p≤0.001
