# Supplementary material for: Calprotectin (S100A8/A9) has the strongest association with ultrasound-detected synovitis and predicts response to biologic treatment: results from a longitudinal study of patients with established rheumatoid arthritis
Source: Springer Nature journal article supplement (doi:10.1186/s13075-016-1201-0), 2017-01-12
Supplement: MOESM3 [file 11995364]

**Supplementary table S2.** Spearman's rank correlation coefficients ( $r_s$ ) between calprotectin and sum US and sum Lansbury US scores

|              | Sum GS score | Sum LGS score | Sum PD score | Sum LPD score |
|--------------|--------------|---------------|--------------|---------------|
| Calprotectin |              |               |              |               |
| Baseline     | 0.59**       | 0.62**        | 0.62**       | 0.63**        |
| 1 month      | 0.51**       | 0.47**        | 0.53**       | 0.57**        |
| 2 months     | 0.50**       | 0.43**        | 0.53**       | 0.52**        |
| 3 months     | 0.37**       | 0.41**        | 0.46**       | 0.47**        |
| 6 months     | 0.48**       | 0.47**        | 0.47**       | 0.50**        |
| 12 months    | 0.25*        | 0.29**        | 0.31**       | 0.29**        |

GS=grey scale, LGS=Lansbury grey scale, PD=power Doppler, LPD=Lansbury power Doppler, \* $p < 0.01$ , \*\* $p \leq 0.001$
