# Supplementary material for: Calprotectin (S100A8/A9) has the strongest association with ultrasound-detected synovitis and predicts response to biologic treatment: results from a longitudinal study of patients with established rheumatoid arthritis
Source: Springer Nature journal article supplement (doi:10.1186/s13075-016-1201-0), 2017-01-12
Supplement: MOESM4 [file 11995364]

**Supplementary table S3.** Spearman's rank correlation coefficients ( $r_s$ ) between calprotectin/conventional inflammatory markers and sum ultrasound scores in patients using tocilizumab (n=12)

|              | Sum GS score |         |          |          |          |           | Sum PD score |         |          |          |          |           |
|--------------|--------------|---------|----------|----------|----------|-----------|--------------|---------|----------|----------|----------|-----------|
|              | Baseline     | 1 month | 2 months | 3 months | 6 months | 12 months | Baseline     | 1 month | 2 months | 3 months | 6 months | 12 months |
| Calprotectin | 0.66*        | 0.45    | 0.53     | 0.30     | 0.64*    | 0.54      | 0.50         | 0.27    | 0.83**   | 0.67*    | 0.57     | 0.57      |
| ESR          | -0.007       | -0.26   | -0.38    | -0.27    | 0.07     | 0.36      | 0.21         | -0.22   | -0.24    | 0.09     | -0.07    | 0.49      |
| CRP          | 0.41         | 0.43    | -0.04    | -0.11    | 0.43     | 0.64*     | 0.36         | 0.26    | 0.22     | 0.54     | 0.23     | 0.72**    |

Sum GS score = sum of grey scale scores on a 0-3 scale of 36 joints and four tendon sheaths, sum PD score= sum power Doppler scores on a 0-3 scale of 36 joints and four tendon sheaths, ESR =erythrocyte sedimentation rate, CRP = C-reactive protein, \* $p < 0.05$ , \*\* $p \leq 0.001$
