# Supplementary material for: Calprotectin (S100A8/A9) has the strongest association with ultrasound-detected synovitis and predicts response to biologic treatment: results from a longitudinal study of patients with established rheumatoid arthritis
Source: Springer Nature journal article supplement (doi:10.1186/s13075-016-1201-0), 2017-01-12
Supplement: MOESM6 [file 11995364]

**Supplementary table S4.** Spearman's rank correlation coefficients ( $r_s$ ) between changes in inflammatory markers and sum US scores/DAS28 from baseline to one, two, three, six and 12 months

| <b>Baseline to one month</b>    | <b>ΔSum GS score</b> | <b>ΔSum PD score</b> | <b>ΔDAS28</b> |
|---------------------------------|----------------------|----------------------|---------------|
| ΔCalprotectin                   | 0.29**               | 0.35**               | 0.47**        |
| ΔS100A12                        | 0.22*                | 0.17*                | 0.22*         |
| ΔIL-6                           | 0.10                 | 0.23*                | 0.15          |
| ΔVEGF                           | 0.14                 | 0.11                 | 0.32**        |
| ΔESR                            | 0.14                 | 0.20*                | 0.65**        |
| ΔCRP                            | 0.14                 | 0.24*                | 0.41*         |
| <b>Baseline to two months</b>   | <b>ΔSum GS score</b> | <b>ΔSum PD score</b> | <b>ΔDAS28</b> |
| ΔCalprotectin                   | 0.39**               | 0.43**               | 0.55**        |
| ΔS100A12                        | 0.17*                | 0.18*                | 0.35**        |
| ΔIL-6                           | 0.30**               | 0.33**               | 0.31**        |
| ΔVEGF                           | 0.12                 | 0.18*                | 0.26*         |
| ΔESR                            | 0.21*                | 0.30**               | 0.60**        |
| ΔCRP                            | 0.32**               | 0.33**               | 0.42**        |
| <b>Baseline to three months</b> | <b>ΔSum GS score</b> | <b>ΔSum PD score</b> | <b>ΔDAS28</b> |
| ΔCalprotectin                   | 0.42**               | 0.46**               | 0.50**        |
| ΔS100A12                        | 0.22*                | 0.21*                | 0.31**        |
| ΔIL-6                           | 0.25*                | 0.25*                | 0.21*         |
| ΔVEGF                           | 0.07                 | 0.10                 | 0.22*         |
| ΔESR                            | 0.14                 | 0.22*                | 0.55**        |
| ΔCRP                            | 0.20*                | 0.27**               | 0.39**        |
| <b>Baseline to six months</b>   | <b>ΔSum GS score</b> | <b>ΔSum PD score</b> | <b>ΔDAS28</b> |
| ΔCalprotectin                   | 0.43**               | 0.45**               | 0.43**        |
| ΔS100A12                        | 0.21*                | 0.23*                | 0.24*         |
| ΔIL-6                           | 0.36**               | 0.48**               | 0.28**        |
| ΔVEGF                           | 0.07                 | 0.11                 | 0.17*         |
| ΔESR                            | 0.24*                | 0.22*                | 0.49**        |
| ΔCRP                            | 0.34**               | 0.35**               | 0.37**        |
| <b>Baseline to 12 months</b>    | <b>ΔSum GS score</b> | <b>ΔSum PD score</b> | <b>ΔDAS28</b> |
| ΔCalprotectin                   | 0.46**               | 0.51**               | 0.46**        |
| ΔS100A12                        | 0.27**               | 0.36**               | 0.26*         |
| ΔIL-6                           | 0.32**               | 0.38**               | 0.25*         |
| ΔVEGF                           | 0.17*                | 0.22*                | 0.25*         |
| ΔESR                            | 0.36**               | 0.42**               | 0.56**        |
| ΔCRP                            | 0.42**               | 0.50**               | 0.47**        |

US = ultrasound scores, DAS28 = disease activity score of 28 joints, GS = grey scale, PD = power Doppler, VEGF = vascular endothelial growth factor, IL-6 = interleukin 6, ESR = erythrocyte sedimentation rate, CRP = C-reactive protein, \* $p < 0.05$ , \*\* $p \leq 0.001$
