# Supplementary material for: Calprotectin (S100A8/A9) has the strongest association with ultrasound-detected synovitis and predicts response to biologic treatment: results from a longitudinal study of patients with established rheumatoid arthritis
Source: Springer Nature journal article supplement (doi:10.1186/s13075-016-1201-0), 2017-01-12
Supplement: MOESM7 [file 11995364]

**Supplementary table S5.** Median (interquartile range) levels of biomarkers in EULAR good, moderate and non responders at three, six and 12 months

|                      | <b>Good responders</b> | <b>Moderate responders</b> | <b>Non responders</b> | <b>p-value 1</b> | <b>p-value 2</b> | <b>p-value 3</b> | <b>p-value 4</b> |
|----------------------|------------------------|----------------------------|-----------------------|------------------|------------------|------------------|------------------|
| <b>Three months</b>  | n=44                   | n=40                       | n=57                  |                  |                  |                  |                  |
| Calprotectin (ng/mL) | 546 (460)              | 691 (705)                  | 748 (812)             | 0.04             | 0.02             | 0.73             | 0.11             |
| S100A12 (ng/mL)      | 110 (248)              | 192 (234)                  | 154 (216)             | 0.14             | 0.08             | 0.85             | 0.24             |
| IL-6 (pg/mL)         | 2.2 (21.1)             | 3.1 (9.3)                  | 4.5 (8.7)             | 0.77             | 0.20             | 0.36             | 0.19             |
| VEGF (pg/mL)         | 78.6 (129.6)           | 46.6 (97.4)                | 76.4 (82.9)           | 0.18             | 0.87             | 0.17             | 0.49             |
| ESR (mm/h)           | 7 (16)                 | 20 (20)                    | 19 (15)               | 0.000            | 0.000            | 0.87             | 0.02             |
| CRP (mg/L)           | 1 (1)                  | 2 (4)                      | 2 (6)                 | 0.02             | 0.002            | 0.62             | 0.03             |
| <b>Six months</b>    | n=53                   | n=43                       | n=45                  |                  |                  |                  |                  |
| Calprotectin (ng/mL) | 579 (350)              | 718 (557)                  | 780 (867)             | 0.08             | 0.02             | 0.34             | 0.05             |
| S100A12 (ng/mL)      | 103 (143)              | 137 (203)                  | 152 (219)             | 0.17             | 0.07             | 0.57             | 0.15             |
| IL-6 (pg/mL)         | 1.9 (3.6)              | 2.4 (4.3)                  | 3.3 (8.5)             | 0.29             | 0.02             | 0.12             | 0.02             |
| VEGF (pg/mL)         | 71.9 (90.4)            | 62.3 (93.7)                | 76.2 (82.1)           | 0.98             | 0.57             | 0.58             | 0.52             |
| ESR (mm/h)           | 10 (12)                | 18 (16)                    | 12 (14)               | 0.003            | 0.03             | 0.43             | 0.36             |
| CRP (mg/L)           | 1 (2)                  | 2 (5)                      | 2 (6)                 | 0.002            | 0.001            | 0.71             | 0.03             |
| <b>12 months</b>     | n=57                   | n=41                       | n=43                  |                  |                  |                  |                  |
| Calprotectin (ng/mL) | 619 (486)              | 641 (502)                  | 666 (834)             | 0.58             | 0.22             | 0.50             | 0.26             |
| S100A12 (ng/mL)      | 140 (275)              | 133 (128)                  | 135 (327)             | 0.69             | 0.52             | 0.29             | 0.35             |
| IL-6 (pg/mL)         | 1.9 (3.5)              | 2.1 (4.0)                  | 2.9 (9.6)             | 0.82             | 0.16             | 0.22             | 0.13             |
| VEGF (pg/mL)         | 79.9 (122.8)           | 68.0 (74.6)                | 64 (66.8)             | 0.76             | 0.58             | 0.84             | 0.65             |
| ESR (mm/h)           | 10 (13)                | 15 (14)                    | 17 (14)               | 0.03             | 0.000            | 0.25             | 0.004            |
| CRP (mg/L)           | 1 (1)                  | 2 (3)                      | 3 (7)                 | 0.23             | 0.001            | 0.03             | 0.001            |

IL-6 = interleukin 6, VEGF = vascular endothelial growth factor, ESR = erythrocyte sedimentation rate, CRP = C-reactive protein

p-value 1: difference between good and moderate responders, p-value 2: difference between good and non-responders, p-value 3: difference between moderate and non- responders, p-value 4: difference between good/moderate and non-responders
